# Supplementary material for: Dyadic promotion of photocatalytic aerobic oxidation via the Mott–Schottky effect enabled by nitrogen-doped carbon from imidazolium-based ionic polymers
Source: Royal Society of Chemistry journal article supplement (doi:10.1039/c8ee02727g), 2018-12-11
Supplement: c8ee02727g1.pdf [file c8ee02727g1.pdf]

## **Supplementary information**

*for*

### **Dyadic promotion of photocatalytic aerobic oxidation *via* the Mott-Schottky effect enabled by nitrogen-doped carbon from imidazolium-based ionic polymer**

Hong Zhong,<sup>a</sup> Can Yang,<sup>b</sup> Lizhou Fan,<sup>a</sup> Zhihua Fu,<sup>a</sup> Xue Yang,<sup>a</sup> Xinchun Wang<sup>b</sup> and  
Ruihu Wang<sup>\*a</sup>

<sup>a</sup> State Key Laboratory of Structural Chemistry, Fujian Institute of Research on the  
Structure of Matter, Chinese Academy of Sciences, Fuzhou, Fujian, 350002, China

<sup>b</sup> State Key Laboratory of Photocatalysis on Energy and Environment, College of  
Chemistry, Fuzhou University, Fuzhou, 350002, China.

**Characterization Instrumentation:** Fourier-transform infrared spectroscopy (FTIR) spectra were recorded with KBr pellets using Perkin-Elmer Instrument. Solid-state  $^{13}\text{C}$  CP/MAS NMR was performed on a Bruker SB Avance III 500 MHz spectrometer with a 4-mm double-resonance MAS probe, a sample spinning rate of 7.0 kHz, a contact time of 2 ms and pulse delay of 5 s. Solid-state UV-vis spectroscopic analyses were performed on a Lambda 35 UV-vis spectrophotometer. Raman spectra were obtained using a Renishaw UV-1000 Photon Design spectrometer at 532 nm excitation focused through a  $100\times$  microscope objective for a total interrogation spot size of  $\sim 1\text{ }\mu\text{m}$ . Powered X-ray diffraction (XRD) patterns were recorded in the range of  $2\theta = 10\text{--}85^\circ$  on a desktop X-ray diffractometer (RIGAKU-Miniflex II) with  $\text{Cu K}_\alpha$  radiation ( $\lambda = 1.5406\text{ }\text{\AA}$ ). Adsorption and desorption isotherms of nitrogen and hydrogen were measured at 77 K using a Micromeritics ASAP 2020 system. The samples were degassed at  $120\text{ }^\circ\text{C}$  for 10 h before the measurements. Surface areas were calculated from the adsorption data using Brunauer-Emmett-Teller (BET) and Langmuir methods. The pore size distribution curves were obtained from the adsorption branches using non-local density functional theory (NLDFT) method. Field-emission scanning electron microscopy (SEM) was performed on a JEOL JSM-7500F operated at an accelerating voltage of 3.0 kV. Transmission electron microscope (TEM) images were obtained with a JEOL JEM-2010 instrument operated at 200 kV. The cyclic voltammetry (CV) and Motte-Schottky measurements were performed using BAS 100B instrument, platinized platinum ( $0.5\text{ cm}^2$ ) as the counter electrode,  $\text{Ag}/\text{AgCl}$  electrode as the reference electrode. Hall effect measurements were performed using HP-5500C instrument with a magnetic field of 0.5 T. X-ray photoelectron spectroscopy (XPS) measurements were performed on a Thermo ESCALAB 250 spectrometer, using non-monochromatic  $\text{Al K}_\alpha$  X-rays as the excitation source and choosing C 1s (284.6 eV) as the reference line. The  $I$ - $V$  curves were obtained on a CH Instruments by varying the voltage between  $\pm 2\text{ V}$ . Gas chromatography (GC) was performed on a Shimadzu GC-2014 equipped with a capillary column (RTX-5,  $30\text{ m} \times 0.25\text{ }\mu\text{m}$ ) using a flame ionization detector. Inductively coupled plasma (ICP) measurement was performed on Jobin Yvon Ultima 2. The apparent quantum efficiency was measured under the normal reaction conditions, except the monochromatic LED lamps with different wavelength cutoff filter. The ILT 950 spectroradiometer was used to measure the intensity of incident

monochromatic illumination. Elemental analyses were performed on an Elementar Vario MICRO Elemental analyzer.

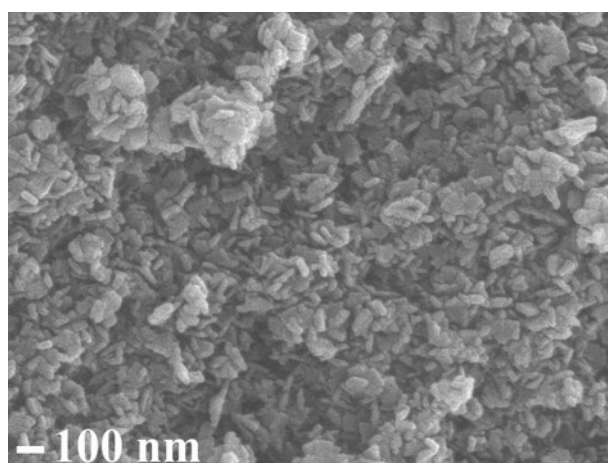

**Fig.S1** SEM image of  $\text{TiO}_2$ .

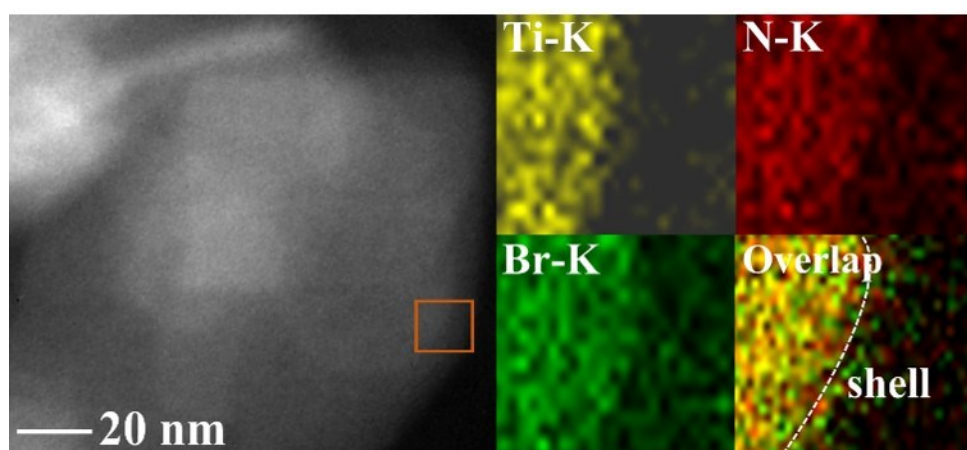

**Fig. S2** HAADF-STEM and EDS elementary mapping images in the marked region for  $\text{TiO}_2@\text{ImIP}$ .

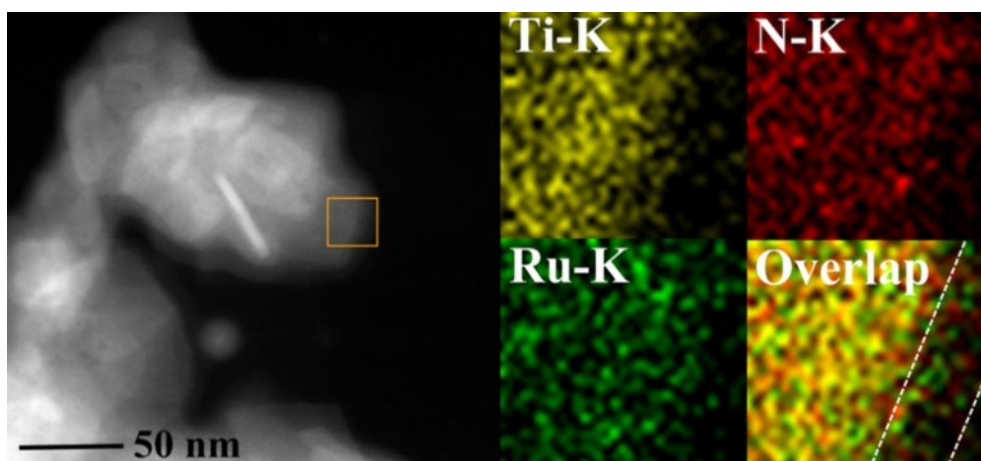

**Fig. S3** HAADF-STEM and EDS elementary mapping images for  $\text{TiO}_2@\text{ImIP-Ru}$ .

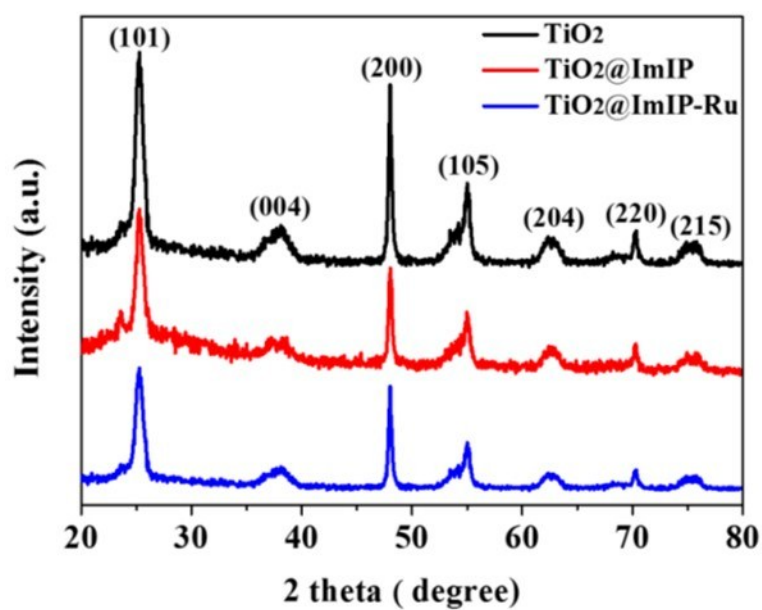

**Fig. S4** XRD patterns of  $\text{TiO}_2$ ,  $\text{TiO}_2@\text{ImIP}$  and  $\text{TiO}_2@\text{ImIP-Ru}$ .

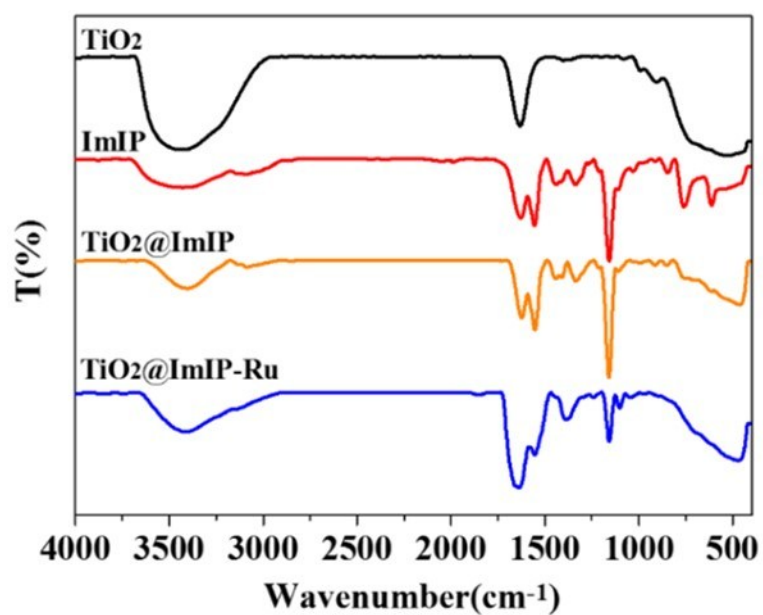

**Fig. S5** FTIR spectra of TiO<sub>2</sub>, ImIP, TiO<sub>2</sub>@ImIP, TiO<sub>2</sub>@ImIP-Ru.

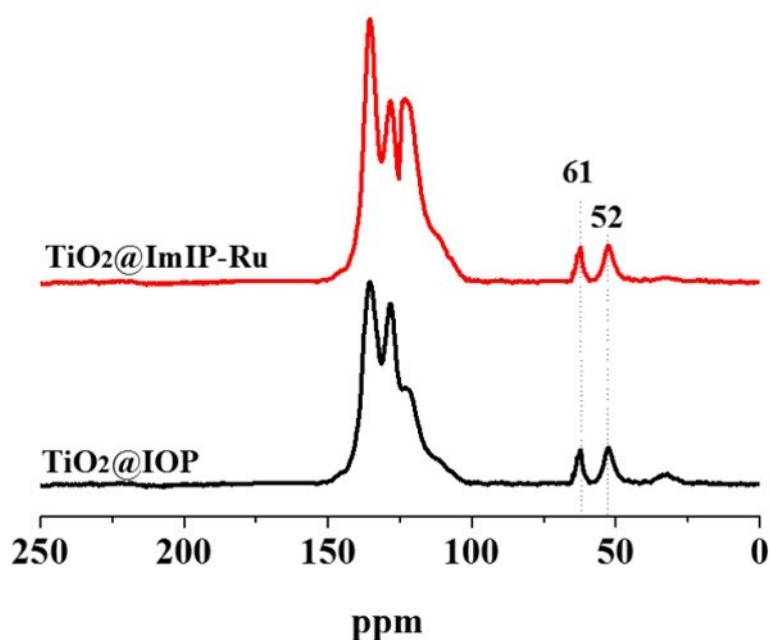

**Fig. S6** The solid-state <sup>13</sup>C NMR spectra of TiO<sub>2</sub>@ImIP and TiO<sub>2</sub>@ImIP-Ru.

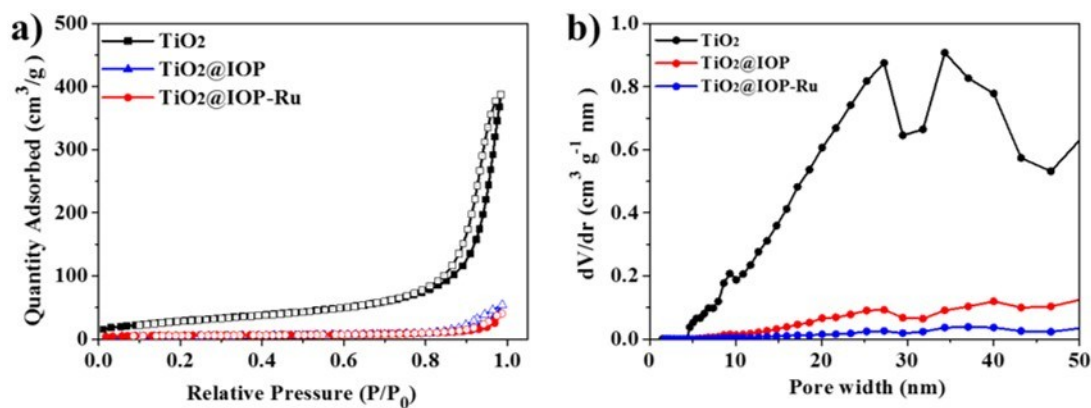

**Fig. S7** (a)  $N_2$  adsorption/desorption isotherms and (b) pore size distribution for  $\text{TiO}_2$ ,  $\text{TiO}_2@\text{ImIP}$  and  $\text{TiO}_2@\text{ImIP-Ru}$ .

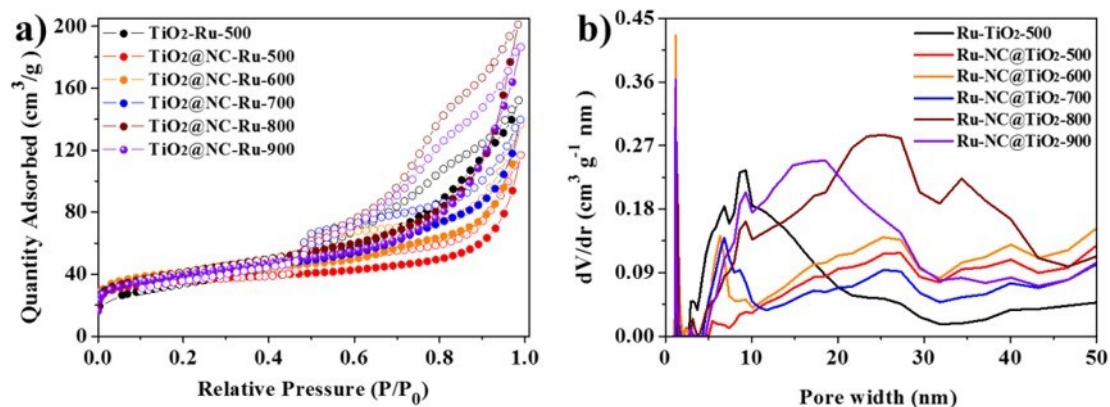

**Fig. S8** (a)  $N_2$  adsorption/desorption isotherms and (b) pore size distribution for  $\text{TiO}_2\text{-Ru-500}$  and  $\text{TiO}_2@\text{NC-Ru-T}$ .

The porous properties of  $\text{TiO}_2$ ,  $\text{TiO}_2@\text{ImIP}$  and  $\text{TiO}_2@\text{ImIP-Ru}$  were investigated by nitrogen physisorption at 77 K. As shown in Supplementary Fig. S7a, their nitrogen adsorption/desorption isotherms exhibit a type IV pattern according to the IUPAC classification<sup>S1</sup>. The apparent hysteresis at high relative pressure in  $\text{TiO}_2$  indicates the presence of extensive mesopores, which probably originates from irregular stacking of  $\text{TiO}_2$  nanosheets. Brunauer-Emmett-Teller (BET) surface area and total pore volume of  $\text{TiO}_2$  are  $108 \text{ m}^2 \text{ g}^{-1}$  and  $0.60 \text{ m}^3 \text{ g}^{-1}$ , respectively. The pore size distribution further reveals that  $\text{TiO}_2$  possesses predominantly mesopore (Supplementary Fig. S7b), which is in accordance with the result of nitrogen adsorption/desorption isotherm. The hysteresis in the sorption isotherms of  $\text{TiO}_2@\text{ImIP}$  and  $\text{TiO}_2@\text{ImIP-Ru}$  is remarkably shrunk in comparison with that of  $\text{TiO}_2$ . The nitrogen uptake amounts are decreased sharply from  $388 \text{ cm}^3 \text{ g}^{-1}$  in  $\text{TiO}_2$  to

54 cm<sup>3</sup> g<sup>-1</sup> in TiO<sub>2</sub>@ImIP and 41 cm<sup>3</sup> g<sup>-1</sup> in TiO<sub>2</sub>@ImIP-Ru. The BET surface areas of TiO<sub>2</sub>@ImIP and TiO<sub>2</sub>@ImIP-Ru are reduced to 36 and 23 m<sup>2</sup> g<sup>-1</sup>, respectively, and their total pore volume are significantly decreased to 0.084 and 0.076 m<sup>3</sup> g<sup>-1</sup>, respectively, which are attributed to both partial pore filling and mass increment after ImIP encapsulation and subsequent anion exchange. It should be mentioned that the contribution of microporosity to total pore volume is negligible in TiO<sub>2</sub>, TiO<sub>2</sub>@ImIP and TiO<sub>2</sub>@ImIP-Ru.

The porous properties of TiO<sub>2</sub>@NC-Ru-T were also investigated by nitrogen physisorption at 77 K (Supplementary Fig. S8a). The nitrogen adsorption-desorption isotherms of TiO<sub>2</sub>@NC-Ru-T exhibit a combination pattern of type I and IV<sup>S1</sup>. The rapid nitrogen uptake at very low relative pressure ( $P/P_0 < 0.01$ ) suggests the presence of micropore, which is attributed to the intrinsic micropore of nitrogen-doped carbon. The obvious hysteresis at high relative pressure indicates the presence of extensive mesopore, which originates from both partial stacking of nanosheets and intrinsic mesopore of nitrogen-doped carbon. BET surface area and total pore volume in TiO<sub>2</sub>@NC-Ru-T are in the range from 131 to 148 m<sup>2</sup> g<sup>-1</sup> and from 0.18 to 0.39 cm<sup>3</sup> g<sup>-1</sup>, respectively (Table S1), which are much higher than corresponding those in TiO<sub>2</sub>, TiO<sub>2</sub>@ImIP and TiO<sub>2</sub>@ImIP-Ru. The pore size distribution further reveals the presence of micropore and mesopore in TiO<sub>2</sub>@NC-Ru-T, which is consistent with the N<sub>2</sub> isotherm results (Supplementary Fig. S8b). In sharp contrast, the nitrogen adsorption-desorption isotherm of TiO<sub>2</sub>-Ru-500 exhibits a type IV pattern, which is similar to that of TiO<sub>2</sub> except with lower nitrogen uptake amount, indicating the retention of the mesopore structure after the loading of Ru NPs. BET surface area and total pore volume in TiO<sub>2</sub>-Ru-500 are 87 m<sup>2</sup> g<sup>-1</sup> and 0.24 cm<sup>3</sup> g<sup>-1</sup>, respectively, which are lower than that of TiO<sub>2</sub> due to both partial pore filling and mass increment after Ru loading. These results reveal that the introduction of nitrogen-doped carbon materials is favorable for porous properties of photocatalysts.



**Table S1.** The texture properties and the compositions for TiO<sub>2</sub>@NC-Ru-T.

| Samples                     | S <sub>BET</sub><br>(m <sup>2</sup> g <sup>-1</sup> ) <sup>a</sup> | V <sub>Total</sub><br>(cm <sup>3</sup> g <sup>-1</sup> ) <sup>a</sup> | Ru NPs<br>size<br>(nm) <sup>b</sup> | Ru<br>loading<br>(mmol g <sup>-1</sup> ) <sup>c</sup> | C<br>content <sup>d</sup> | N<br>content <sup>d</sup> | I <sub>D</sub> /I <sub>G</sub> <sup>e</sup> |
|-----------------------------|--------------------------------------------------------------------|-----------------------------------------------------------------------|-------------------------------------|-------------------------------------------------------|---------------------------|---------------------------|---------------------------------------------|
| TiO <sub>2</sub> @NC-Ru-500 | 131                                                                | 0.18                                                                  | 1.90±0.20                           | 0.293                                                 | 15.13                     | 1.75                      | 1.16                                        |
| TiO <sub>2</sub> @NC-Ru-600 | 136                                                                | 0.21                                                                  | 2.35±0.20                           | 0.312                                                 | 12.51                     | 1.22                      | 1.05                                        |
| TiO <sub>2</sub> @NC-Ru-700 | 142                                                                | 0.27                                                                  | 2.85±0.40                           | 0.326                                                 | 12.19                     | 1.01                      | 0.96                                        |
| TiO <sub>2</sub> @NC-Ru-800 | 146                                                                | 0.31                                                                  | 3.20±0.50                           | 0.346                                                 | 11.57                     | 0.79                      | 0.91                                        |
| TiO <sub>2</sub> @NC-Ru-900 | 148                                                                | 0.39                                                                  | 3.90±0.50                           | 0.363                                                 | 11.15                     | 0.39                      | 0.87                                        |
| TiO <sub>2</sub> -Ru-500    | 87                                                                 | 0.24                                                                  | -                                   | 0.280                                                 | -                         | -                         | -                                           |

<sup>a</sup>Calculated from nitrogen adsorption/desorption isotherms; <sup>b</sup>Determined by TEM analyses; <sup>c</sup>Determined by ICP analyses; <sup>d</sup>Determined by elementary analyses; <sup>e</sup>Calculated from the Raman spectra.

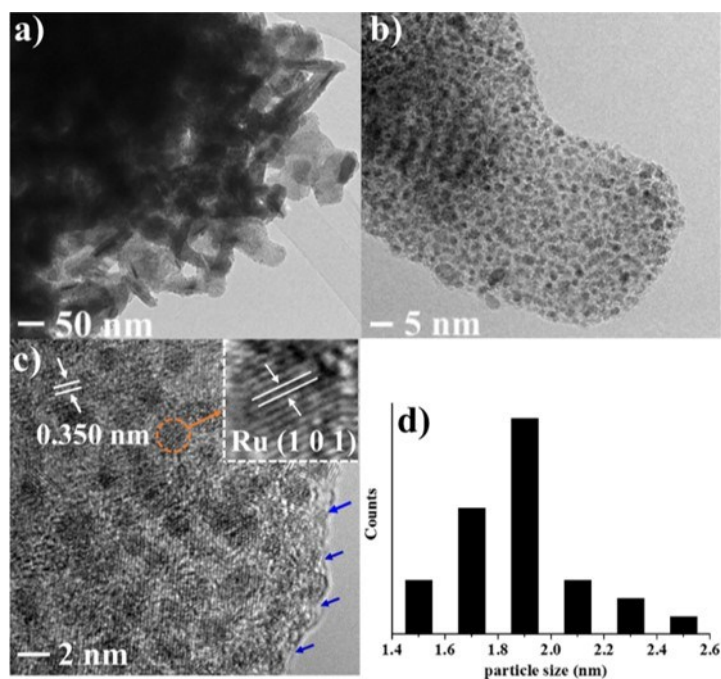

**Fig. S9** (a, b) TEM images, (c) HRTEM image and (d) the size distribution of Ru NPs for TiO<sub>2</sub>@NC-Ru-500. Blue arrows in c are indicative of NC.

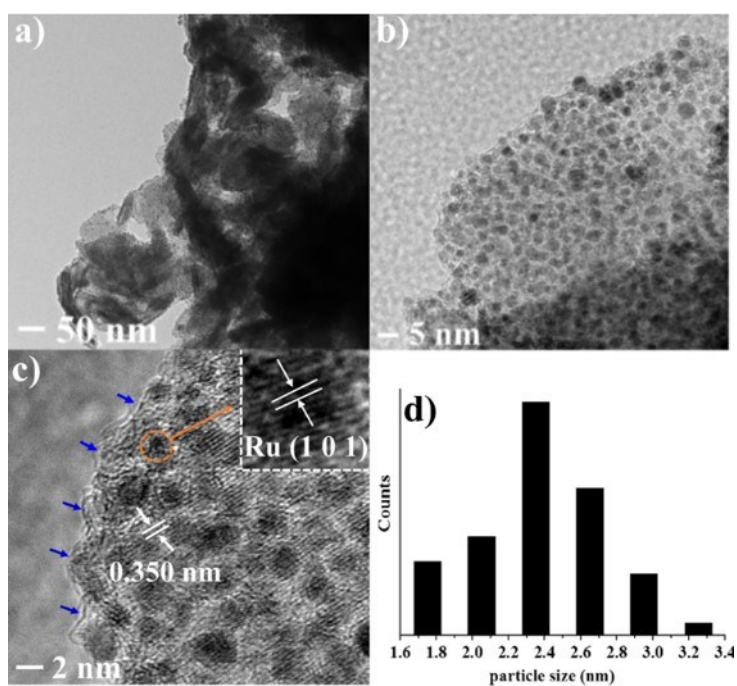

**Fig. S10** (a, b) TEM images, (c) HRTEM image and (d) the size distribution of Ru NPs for TiO<sub>2</sub>@NC-Ru-600. Blue arrows in c are indicative of NC.

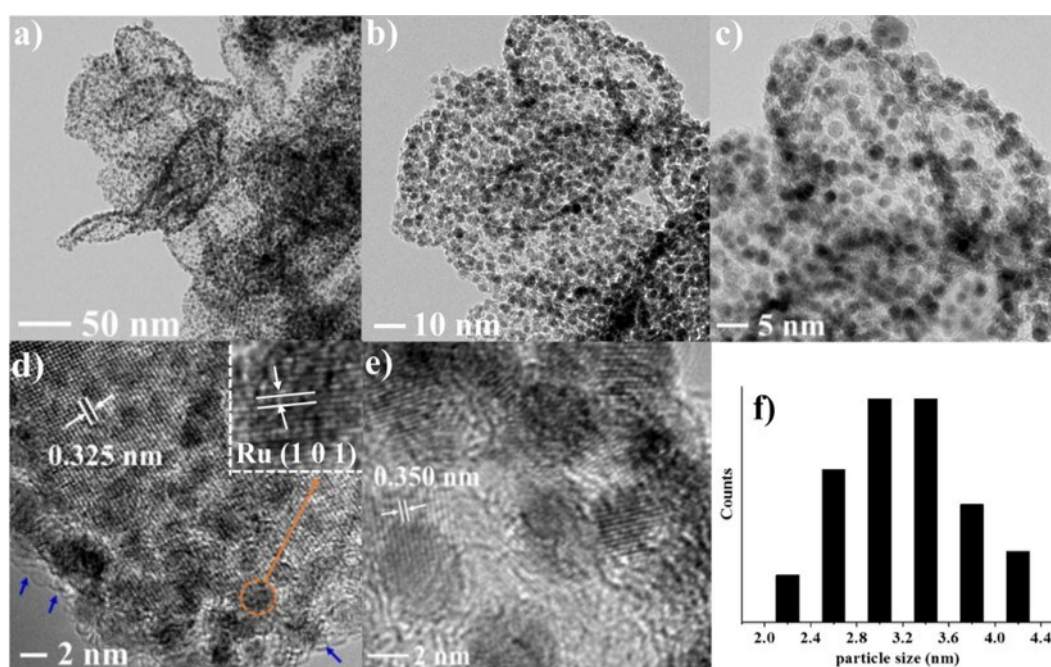

**Fig. S11** (a, b, c) TEM images, (d, e) HRTEM images and (f) the size distribution of Ru NPs for TiO<sub>2</sub>@NC-Ru-800. Blue arrows in d are indicative of NC.

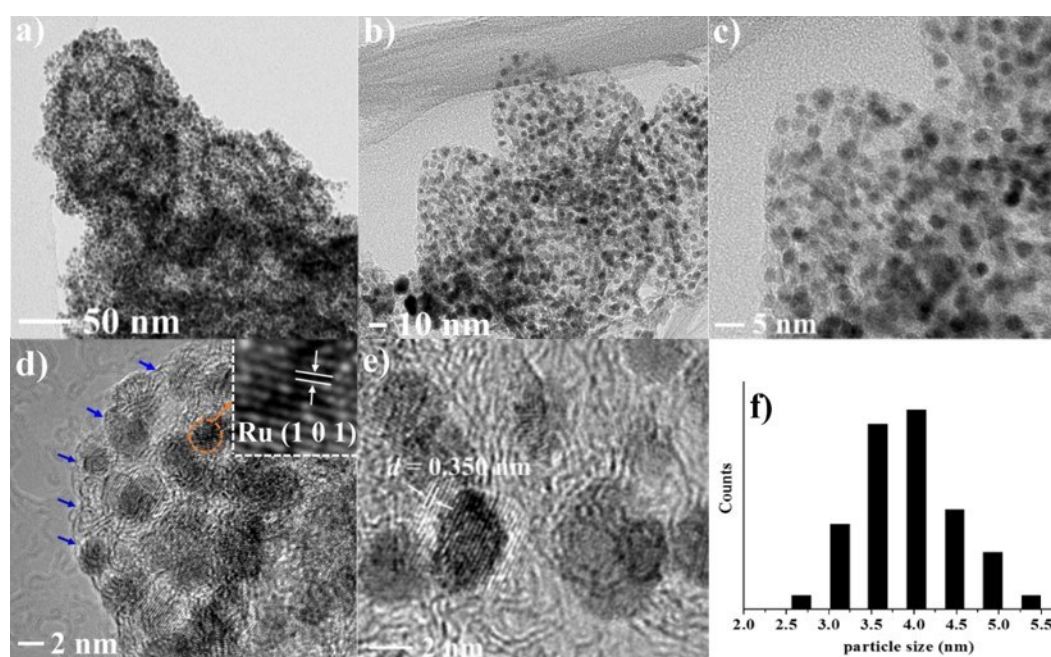

**Fig. S12** (a, b, c) TEM images, (d, e) HRTEM images and (f) the size distribution of Ru NPs for TiO<sub>2</sub>@NC-Ru-900. Blue arrows in d are indicative of NC.

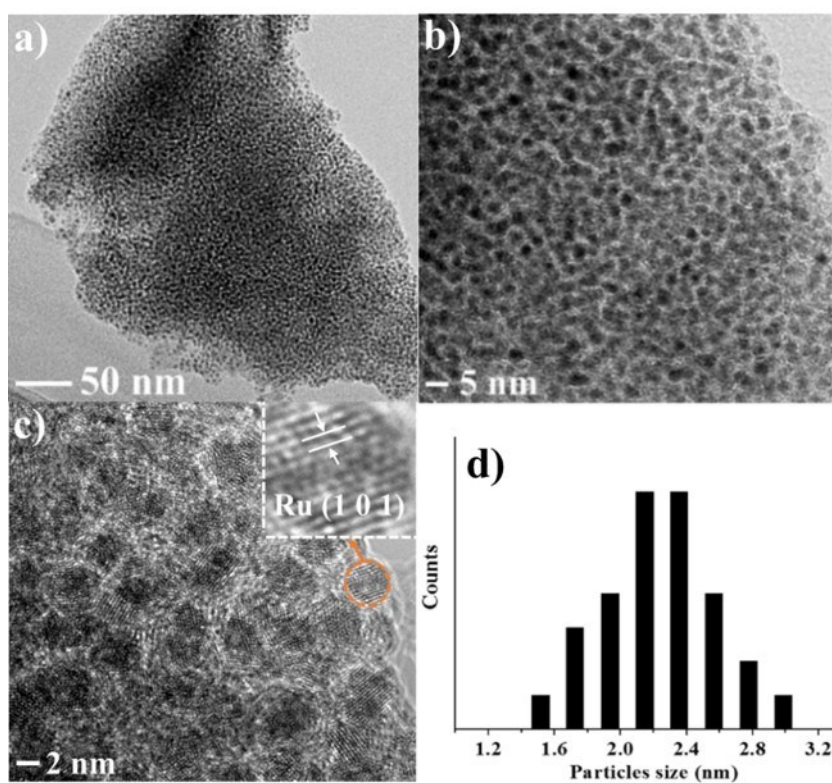

**Fig. S13** (a, b) TEM images, (c) HRTEM image and (d) the size distribution of Ru NPs for NC-Ru-700.

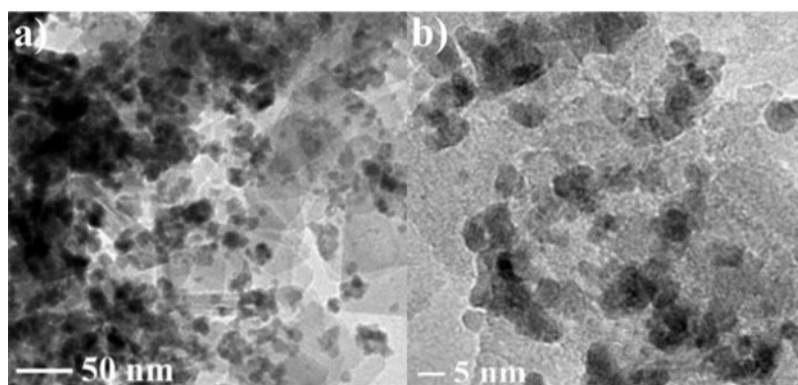

**Figure S14.** TEM images for TiO<sub>2</sub>-Ru-500.



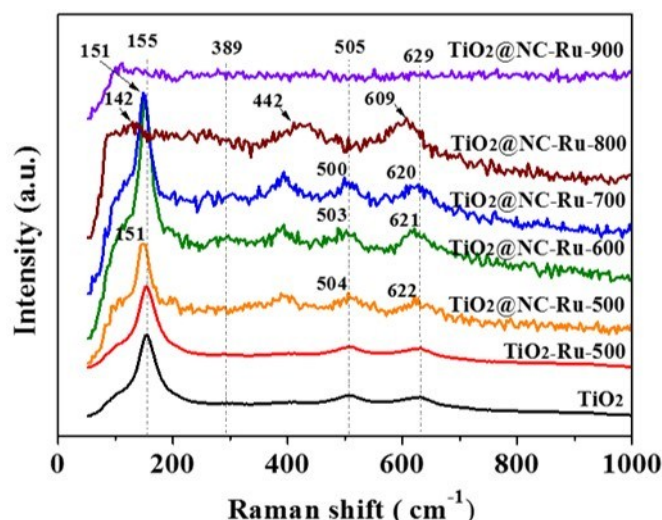

**Fig. S15** Raman spectra for  $\text{TiO}_2$ ,  $\text{TiO}_2\text{-Ru-500}$  and  $\text{TiO}_2\text{@NC-Ru-T}$  in the range of 50-1000  $\text{cm}^{-1}$ .

The Raman spectra of the  $\text{TiO}_2$  nanosheets,  $\text{TiO}_2\text{-Ru-500}$  and  $\text{TiO}_2\text{@NC-Ru-T}$  are shown in Fig. 4b.  $\text{TiO}_2\text{-Ru-500}$  shows the characteristic peaks of anatase at 155, 389, 505 and 630  $\text{cm}^{-1}$ , which are almost identical with that of the  $\text{TiO}_2$  nanosheets<sup>S2-S4</sup>, indicating the loading of Ru NPs has negligible effect on the  $\text{TiO}_2$  nanosheets. The peaks in the Raman spectra of  $\text{TiO}_2\text{@NC-Ru-500}$ ,  $\text{TiO}_2\text{@NC-Ru-600}$  and  $\text{TiO}_2\text{@NC-Ru-700}$  are similar to those of  $\text{TiO}_2$  and  $\text{Ru@TiO}_2$  in the range of 50-1000  $\text{cm}^{-1}$  except with a slight red shift, further indicating the anatase phase of  $\text{TiO}_2$  are intact after pyrolysis at 700 °C (Supplementary Fig. S15). The red shift of the Raman peaks indicates that a more strong interaction between nitrogen-doped carbon and  $\text{TiO}_2$ <sup>S2</sup>. It should be mentioned that the  $\text{TiO}_2\text{@NC-Ru-800}$  shows distinctly different peaks at 142, 442 and 609  $\text{cm}^{-1}$ , which suggests that the phase transformation of the  $\text{TiO}_2$  nanosheets from anatase to rutile during pyrolysis at 800 °C<sup>S2</sup>. The total disappearance of characteristic peaks in the range of 50-1000  $\text{cm}^{-1}$  indicates that  $\text{TiO}_2\text{@NC-Ru-900}$  is mainly composed of amorphous  $\text{TiO}_2$ . These Raman spectra analyses are entirely consistent with their XRD results and TEM observations.

The roles of the carbon materials in  $\text{TiO}_2\text{@NC-Ru-T}$  were also disclosed by Raman spectroscopy. All samples show the characteristic D-band and G-band of the carbon species at 1346 and 1588  $\text{cm}^{-1}$ , respectively. The intensity ratio of D-band/G-band is indicative of the degree of graphitization. As shown in Table S1, the ratios gradually decrease from 1.16 in  $\text{TiO}_2\text{@NC-Ru-500}$  to 0.87 in  $\text{TiO}_2\text{@NC-Ru-900}$  with

increasing pyrolysis temperature of TiO<sub>2</sub>@ImIP-Ru. This result is in good agreement with the observation of TEM images.

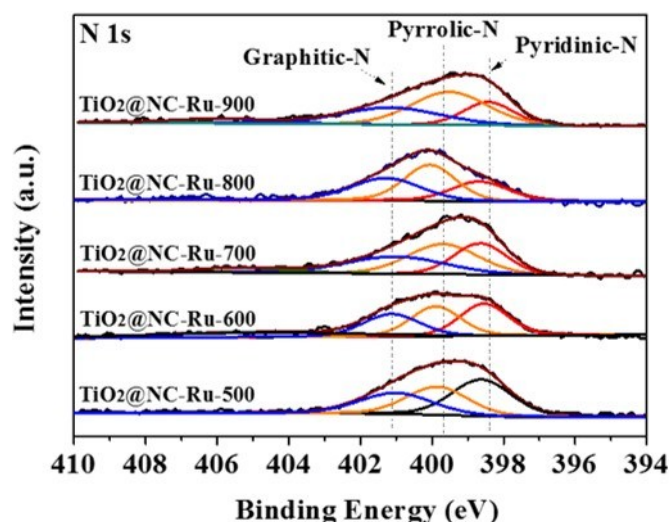

**Fig. S16** N 1s XPS spectra of TiO<sub>2</sub>@NC-Ru-T.

The surface compositions in TiO<sub>2</sub>@NC-Ru-T were investigated by X-ray photoelectron spectroscopy (XPS). As shown in Fig. 4c, the overlapping of C 1s emission and the Ru 3d<sub>3/2</sub> component at 284.8 eV makes unequivocal determination difficult, but the deconvolution of Ru 3d XPS spectra provides two sets of double peaks corresponding to Ru 3d<sub>5/2</sub> and Ru 3d<sub>3/2</sub>. The binding energy peaks of Ru 3d<sub>5/2</sub> at 280.28 and 281.39 eV in TiO<sub>2</sub>@NC-Ru-T are assigned to Ru(0) and Ru ( $\delta^+$ ) species<sup>S5</sup>, respectively. The pyrolysis temperatures have no apparent effect on the Ru 3d binding energy peaks. However, the binding energy peak of Ru(0) 3d<sub>5/2</sub> in TiO<sub>2</sub>-Ru-500 occurs at 280.70 eV, the negative shift by 0.42 eV in TiO<sub>2</sub>@NC-Ru-T suggests the strong interaction between Ru NPs and nitrogen-doped carbon, in which the electron donation from N-doped carbon to Ru NPs makes Ru species more electron-rich. In the high-resolution N 1s XPS spectra of TiO<sub>2</sub>@NC-Ru-T, the presence of pyridinic N (398.5 eV), pyrrolic N (399.7 eV) and graphitic N (401.1 eV) could be clearly identified (Supplementary Fig. S16)<sup>S6</sup>, which is consistent with HRTEM observations and Raman results.

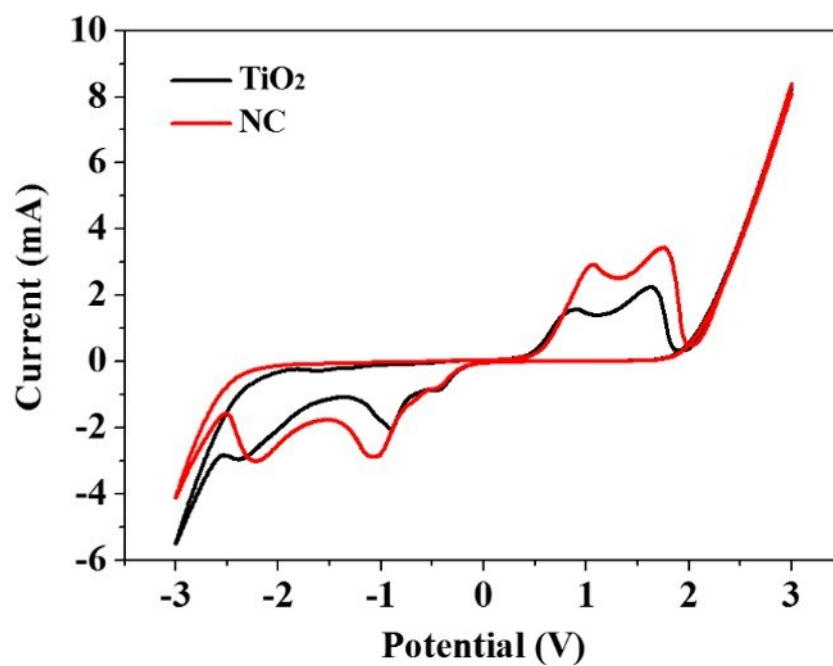

Fig. S17 Cyclic voltammetry curves for TiO<sub>2</sub> and NC.

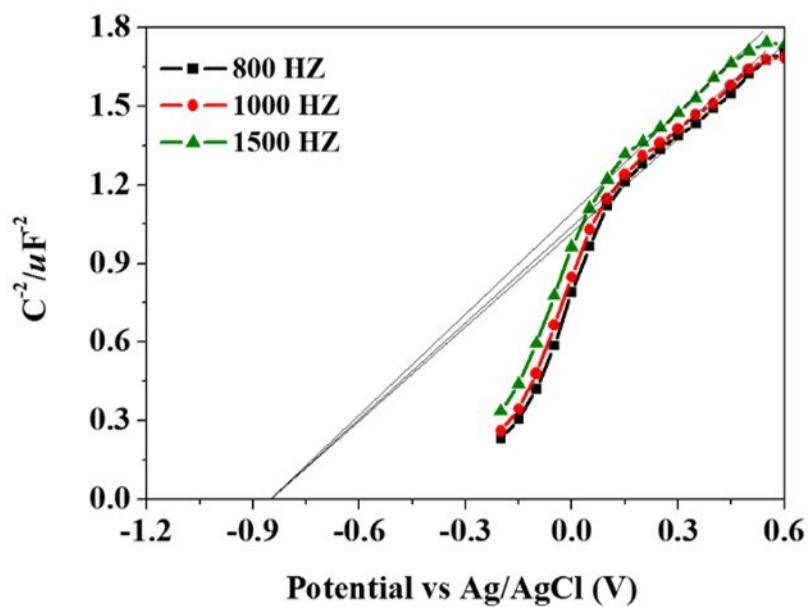

Fig. S18 Mott-Schottky plots of TiO<sub>2</sub> nanosheet.

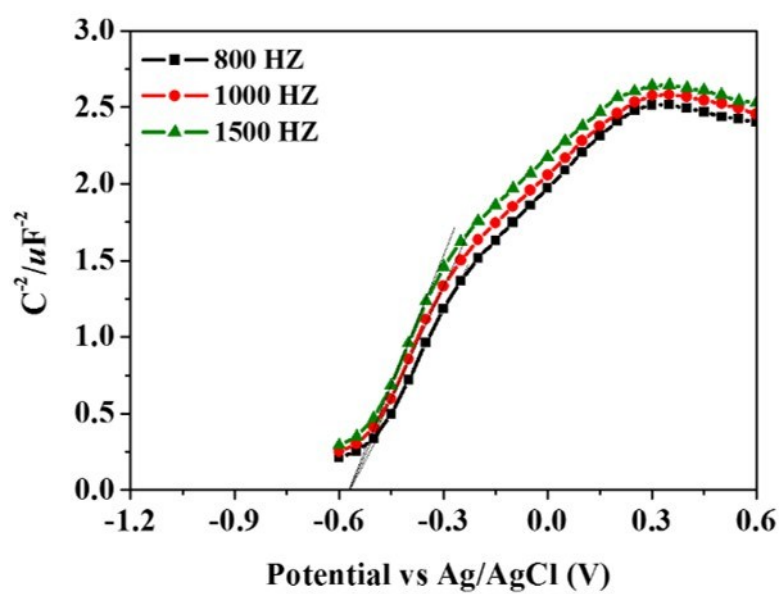

Fig. S19 Mott-Schottky plots of NC.

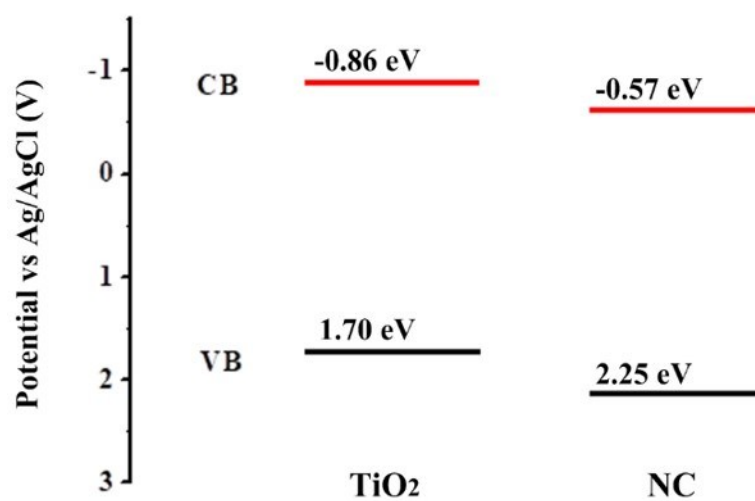

Fig. S20 The energy band structure of NC and TiO<sub>2</sub>.



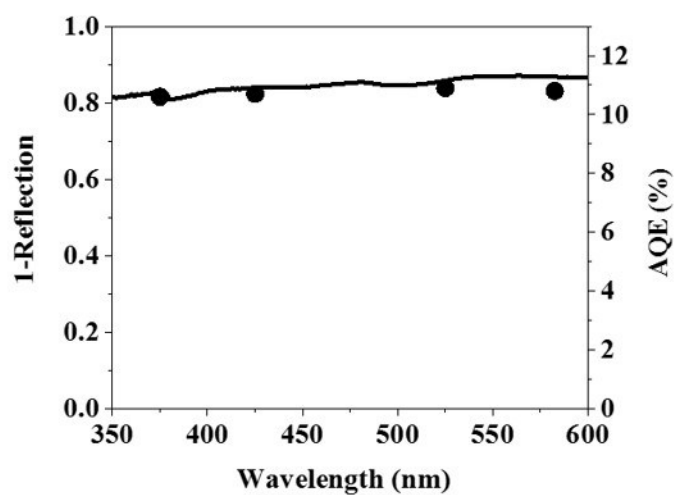

**Fig. S21** Action spectrum for the photocatalytic oxidation of benzyl alcohol in  $\text{TiO}_2@\text{NC-Ru-700}$ .

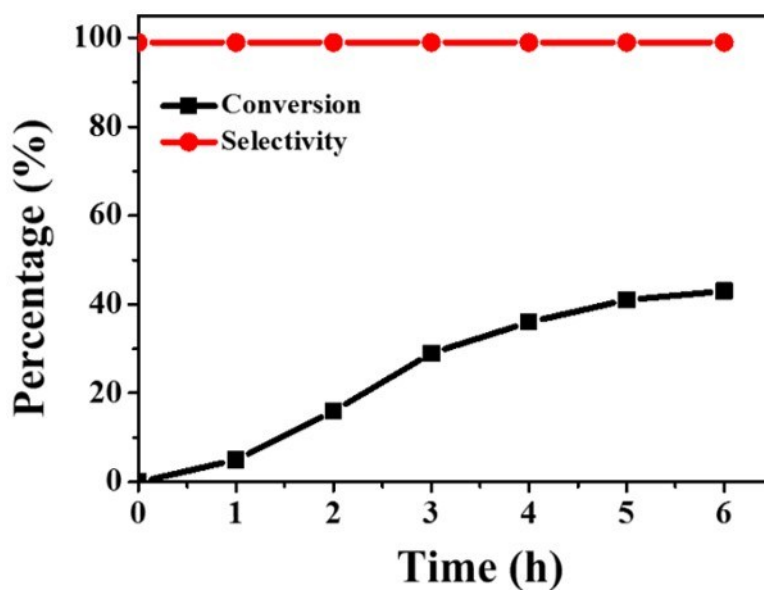

**Fig. S22** The kinetic curve for  $\text{TiO}_2@\text{NC-Ru-700}$  in the photocatalytic oxidation of benzyl alcohol under visible light irradiation. Reaction conditions: benzyl alcohol (0.5 mmol), Ru (1.0 mol%),  $\text{H}_2\text{O}$  (1 mL), air (1 atm) and 25 °C.

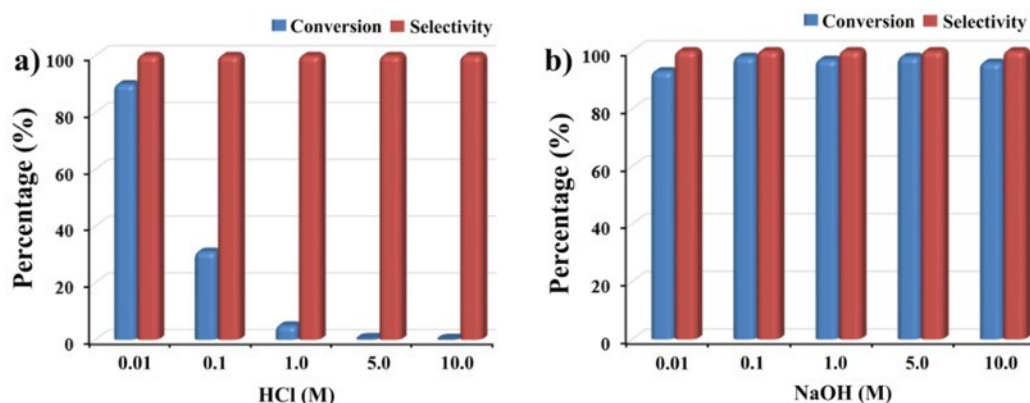

**Fig. S23** The catalytic activity and selectivity of  $\text{TiO}_2\text{@NC-Ru-700}$  in the aerobic oxidation of benzyl alcohol under acid and alkaline environment. Reaction conditions: benzyl alcohol (0.5 mmol), Ru (1.0 mol%), aqueous solution (1 mL), air (1 atm) and direct visible light exposure (56 °C).

The photocatalytic activities of  $\text{TiO}_2\text{@NC-Ru-700}$  in the aerobic oxidation of benzyl alcohol were investigated under acid and alkaline conditions. The conversions of benzyl alcohol has no appreciable change in 0.01 M of aqueous HCl solution, while the use of 0.1 M and 1.0 M of aqueous HCl solution result in rapid decrement of the catalytic activity to 33% and 5%, respectively. The negligible conversion is detected in 5.0 M and 10.0 M of HCl aqueous solution (Fig. S22a, ESI†). However, the alkaline environment is beneficial for the catalytic reaction, and the conversions of benzyl alcohol in 0.01 and 0.1 M of aqueous NaOH solution increase to 94% and 99%, respectively, further increment of basicity has no obvious effect on the reaction (Fig. S22b, ESI†). It should mentioned that the selectivity remains above 99% both in acid and alkaline environment.

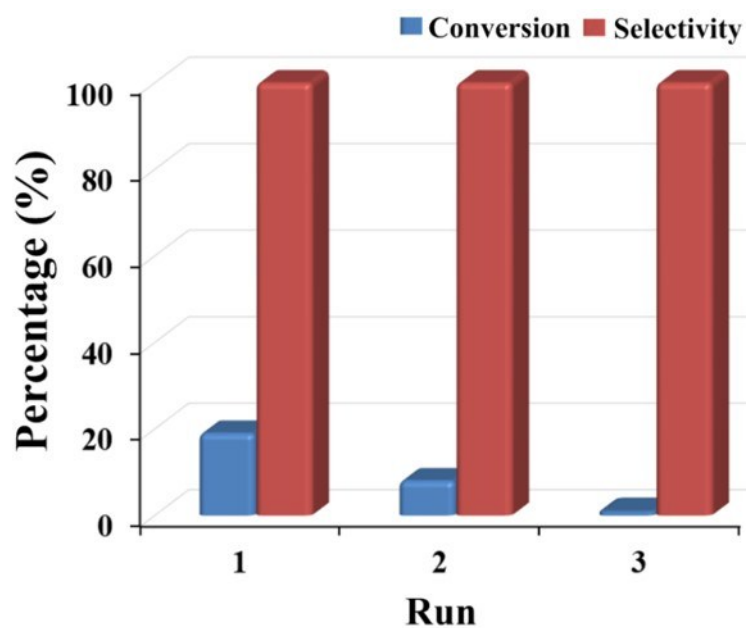

**Fig. S24** Recyclability of  $\text{TiO}_2\text{-Ru-500}$  in the aerobic oxidation of benzyl alcohol upon direct visible light exposure; Reaction conditions: benzyl alcohol (0.5 mmol), Ru (1.0 mol%),  $\text{H}_2\text{O}$  (1 mL), air (1 atm), upon direct visible light exposure, 6 h.

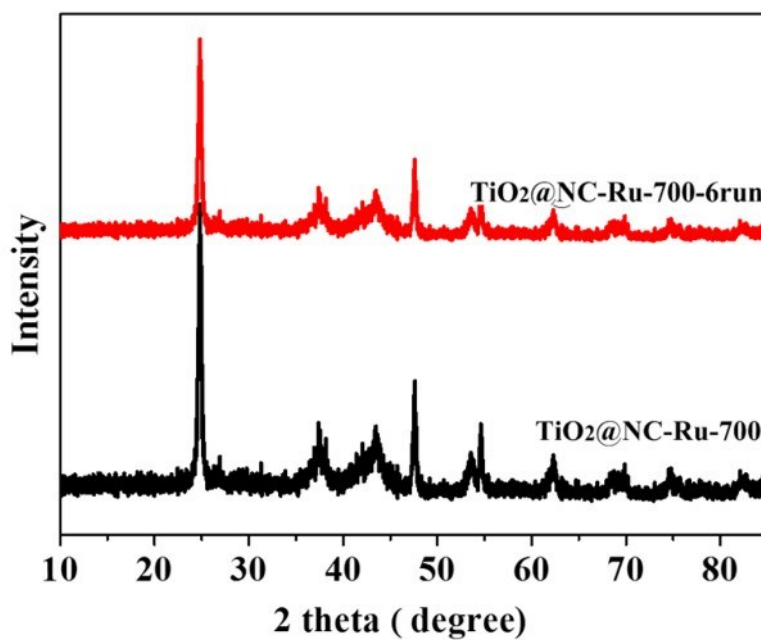

**Fig. S25** XRD patterns of  $\text{TiO}_2\text{@NC-Ru-700}$  and  $\text{TiO}_2\text{@NC-Ru-700-6run}$ .

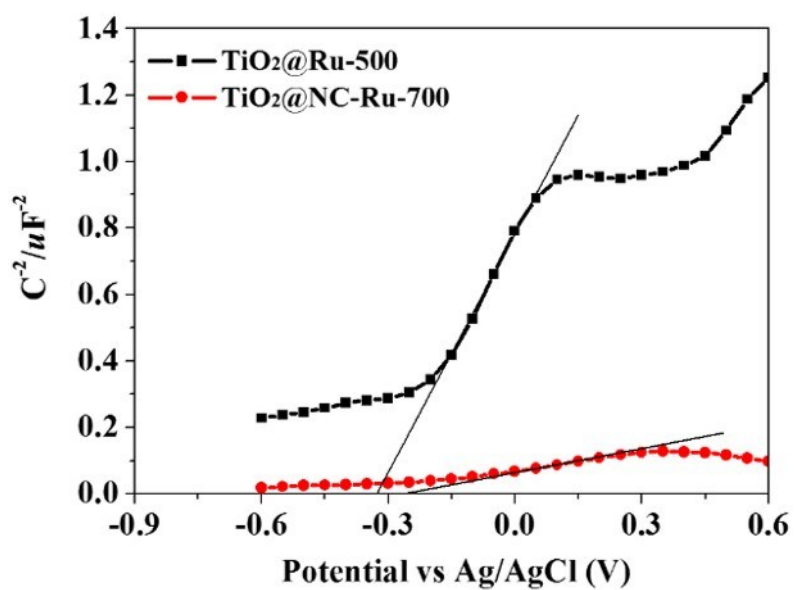

**Fig. S26** Mott-Schottky plots of  $\text{TiO}_2@\text{-Ru-500}$  and  $\text{TiO}_2@\text{NC-Ru-700}$  at the frequency of 1 kHz

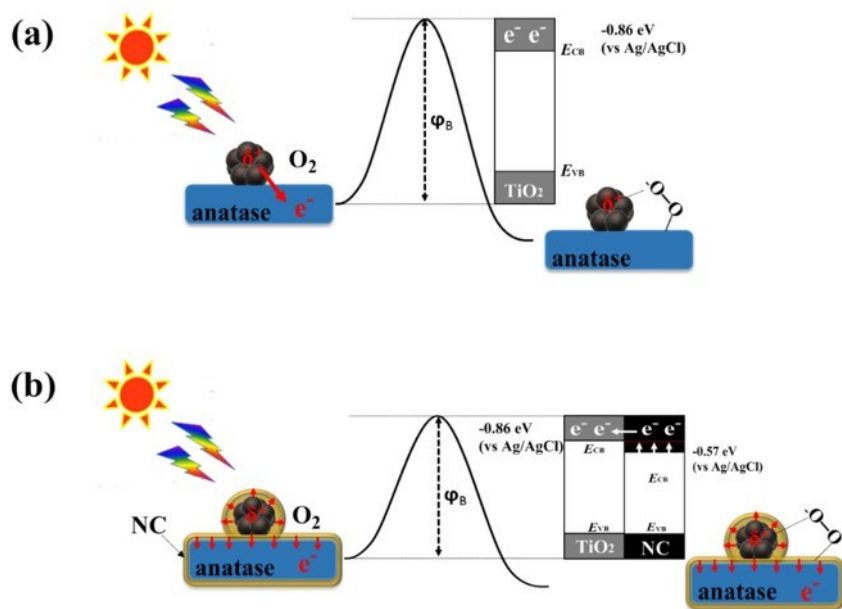

**Fig. 27** The photoelectron transfer mechanism in (a)  $\text{TiO}_2@\text{-Ru-500}$  and (b)  $\text{TiO}_2@\text{NC-Ru-700}$ .

## References

- S1 G. L. Aranovich and M. D. Donohue, *Adv. Colloid Interface*, 1998, **77**, 137-152.
- S2 L. W. Zhang, H. B. Fu and Y. F. Zhu, *Adv. Funct. Mater.*, 2008, **18**, 2180-2189.
- S3 L. Wu, D. Bresser, D. Buchholz, G. A. Giffin, C. R. Castro, A. Ochel and S. Passerini, *Adv. Energy Mater.*, 2015, **5**, 1401142.
- S4 J. Wang, H. Wu, D. Gao, S. Miao, G. Wang and X. Bao, *Nano Energy*, 2015, **13**, 387-396
- S5 V. V. Costa, M. J. Jacinto, L. M. Rossi, R. Landers and E. V. Gusevskaya, *J. Catal.* 2011, **282**, 209-214.
- S6 L. Li, C. Cui, H. Fan and R. Wang, *ChemSusChem*, 2017, **10**, 4921-4926.
